# Supplementary material for: Association between MCU Gene Polymorphisms with Obesity: Findings from the All of Us Research Program
Source: MDPI journal article supplement (doi:10.3390/genes15040512), 2024-04-19
Supplement: s1 [file s1]

**Supplementary Materials**

Table S1: Frequency of Selected MCU SNPs in the AoU cohort

| SNPs       | A1 | A2 | MAF (%) | Type of Mutation |
|------------|----|----|---------|------------------|
| rs34072881 | C  | T  | 5.2%    | synonymous       |
| rs3009556  | T  | C  | 72.4%   | Intronic         |
| rs6415912  | A  | G  | 70.9%   | Intronic         |
| rs6480644  | C  | T  | 70.8%   | Intronic         |
| rs2121094  | G  | A  | 66.7%   | Intronic         |
| rs7092031  | G  | T  | 66.7%   | Intronic         |
| rs2121097  | A  | T  | 66.6%   | Intronic         |
| rs7081970  | C  | T  | 66.5%   | Intronic         |
| rs9416029  | A  | G  | 53.8%   | Intronic         |
| rs3009550  | G  | A  | 53.4%   | Intronic         |
| rs3009554  | G  | A  | 52.9%   | Intronic         |

Abbreviations: SNP: single-nucleotide polymorphism; MAF: minor allele frequency.

Table S2: Association of MCU SNPs with obesity in the AoU cohort

| SNP        | Alleles | White Men       |          | White Women     |          | Black/AA Men    |          | Black/AA Women  |          |
|------------|---------|-----------------|----------|-----------------|----------|-----------------|----------|-----------------|----------|
|            |         | OR (95% CI)     | P-value  |
| rs34072881 | C/T     | --              | --       | --              | --       | 1.30(1.12-1.50) | 0.0004*  | 0.77(0.69-0.86) | <0.0001* |
| rs3009556  | T/C     | 0.98(0.93-1.04) | 0.505    | 1.00(0.97-1.04) | 0.799    | 0.75(0.70-0.80) | <0.0001* | 1.06(1.00-1.11) | 0.035    |
| rs6415912  | A/G     | 1.05(0.99-1.11) | 0.0868   | 0.94(0.91-0.98) | 0.002*   | 0.79(0.74-0.84) | <0.0001* | 1.07(1.02-1.12) | 0.007    |
| rs6480644  | C/T     | 1.05(0.99-1.11) | 0.0887   | 0.94(0.90-0.97) | 0.0004*  | 0.79(0.74-0.84) | <0.0001* | 1.07(1.01-1.12) | 0.011    |
| rs2121094  | G/A     | 0.89(0.84-0.95) | 0.0002*  | 0.89(0.86-0.92) | <0.0001* | 0.74(0.69-0.79) | <0.0001* | 0.98(0.93-1.03) | 0.403    |
| rs7092031  | G/T     | 0.89(0.84-0.95) | 0.0002*  | 0.88(0.85-0.92) | <0.0001* | 0.70(0.66-0.75) | <0.0001* | 0.98(0.93-1.03) | 0.365    |
| rs2121097  | A/T     | 0.89(0.84-0.95) | 0.0002*  | 0.89(0.85-0.92) | <0.0001* | 0.70(0.66-0.75) | <0.0001* | 1.00(0.95-1.04) | 0.872    |
| rs7081970  | C/T     | 0.80(0.75-0.85) | <0.0001* | 0.87(0.84-0.90) | <0.0001* | 0.72(0.67-0.76) | <0.0001* | 1.00(0.95-1.05) | 0.87     |
| rs9416029  | A/G     | 1.00(0.95-1.05) | 0.977    | 0.89(0.86-0.92) | <0.0001* | 1.46(1.33-1.59) | <0.0001* | 1.60(1.48-1.73) | <0.0001* |
| rs3009550  | G/A     | 0.80(0.75-0.85) | <0.0001* | 0.86(0.83-0.90) | <0.0001* | 0.93(0.90-0.97) | 0.0006*  | 1.08(1.05-1.12) | <0.0001* |
| rs3009554  | G/A     | 0.90(0.85-0.95) | 0.0004*  | 0.89(0.86-0.92) | <0.0001* | 1.68(1.53-1.86) | <0.0001* | 1.38(1.27-1.50) | <0.0001* |

Abbreviations: SNP: single nucleotide polymorphism; MAF: minor allele frequency; CI: confidence interval. The odds ratios and corresponding p-values were calculated using logistic regression adjusting for age and HbA1c levels. p was significant at a value of <0.05. \* Statistical significance.

Table S3: Association of MCU SNPs with BMI in the AoU cohort

| SNP        | Alleles | White Men           |         | White Women         |         | Black/AA Men        |         | Black/AA Women      |         |
|------------|---------|---------------------|---------|---------------------|---------|---------------------|---------|---------------------|---------|
|            |         | Estimate( $\beta$ ) | P-value |
| rs34072881 | C/T     | --                  | --      | --                  | --      | 0.037(0.107)        | 0.729   | 0.063(0.106)        | 0.554   |
| rs3009556  | T/C     | -0.045(0.035)       | 0.206   | -0.038(0.024)       | 0.117   | 0.045(0.045)        | 0.318   | -0.012(0.047)       | 0.805   |
| rs6415912  | A/G     | -0.027(0.036)       | 0.455   | -0.027(0.025)       | 0.278   | 0.030(0.044)        | 0.494   | 0.026(0.048)        | 0.589   |
| rs6480644  | C/T     | -0.027(0.036)       | 0.455   | -0.026(0.025)       | 0.293   | 0.030(0.044)        | 0.494   | 0.023(0.047)        | 0.629   |
| rs2121094  | G/A     | -0.043(0.035)       | 0.219   | -0.039(0.025)       | 0.117   | 0.007(0.043)        | 0.865   | 0.007(0.046)        | 0.874   |
| rs7092031  | G/T     | -0.043(0.035)       | 0.219   | -0.040(0.025)       | 0.109   | 0.007(0.043)        | 0.865   | 0.006(0.046)        | 0.903   |
| rs2121097  | A/T     | -0.040(0.035)       | 0.219   | -0.040(0.025)       | 0.109   | 0.011(0.043)        | 0.792   | 0.003(0.046)        | 0.955   |
| rs7081970  | C/T     | -0.043(0.035)       | 0.219   | -0.038(0.025)       | 0.124   | 0.007(0.043)        | 0.874   | 0.003(0.047)        | 0.955   |
| rs9416029  | A/G     | -0.059(0.036)       | 0.099   | -0.038(0.025)       | 0.125   | 0.014(0.053)        | 0.794   | 0.025(0.067)        | 0.713   |
| rs3009550  | G/A     | -0.038(0.030)       | 0.208   | -0.032(0.021)       | 0.13    | 0.039(0.027)        | 0.16    | -0.020(0.030)       | 0.494   |
| rs3009554  | G/A     | -0.059(0.036)       | 0.099   | -0.038(0.025)       | 0.125   | 0.062(0.059)        | 0.291   | 0.058(0.072)        | 0.429   |

Abbreviations: BMI: body mass index; SNP: single nucleotide polymorphism; MAF: minor allele frequency. A linear regression was performed with an additive model; BMI for adjusted age and HbA1c levels. The associations' results are estimate, standard error ( $\beta$ ), and the corresponding p-value. p was significant at a value of <0.05. \* Statistical significance

Tables S4: Association of MCU SNPs with waist circumference in the AoU cohort

| SNP        | Alleles | White Men           |         | White Women         |         | Black/AA Men        |         | Black/AA Women      |         |
|------------|---------|---------------------|---------|---------------------|---------|---------------------|---------|---------------------|---------|
|            |         | Estimate( $\beta$ ) | P-value |
| rs34072881 | C/T     | --                  | --      | --                  | --      | 0.149(0.144)        | 0.302   | 0.135(0.175)        | 0.442   |
| rs3009556  | T/C     | -0.026(0.052)       | 0.615   | -0.033(0.041)       | 0.42    | 0.078(0.071)        | 0.274   | -0.007(0.075)       | 0.928   |
| rs6415912  | A/G     | -0.030(0.052)       | 0.566   | -0.004(0.042)       | 0.928   | 0.016(0.070)        | 0.815   | 0.006(0.075)        | 0.934   |
| rs6480644  | C/T     | -0.030(0.052)       | 0.566   | -0.003(0.042)       | 0.942   | 0.016(0.070)        | 0.815   | -0.001(0.075)       | 0.992   |
| rs2121094  | G/A     | -0.032(0.051)       | 0.528   | -0.050(0.041)       | 0.233   | -0.002(0.069)       | 0.98    | -0.025(0.074)       | 0.733   |
| rs7092031  | G/T     | -0.032(0.051)       | 0.528   | -0.050(0.041)       | 0.226   | -0.002(0.069)       | 0.98    | -0.019(0.074)       | 0.802   |
| rs2121097  | A/T     | -0.032(0.051)       | 0.528   | -0.050(0.041)       | 0.223   | 0.009(0.069)        | 0.895   | -0.040(0.073)       | 0.586   |
| rs7081970  | C/T     | -0.032(0.051)       | 0.528   | -0.049(0.041)       | 0.241   | 0.018(0.069)        | 0.798   | -0.040(0.073)       | 0.586   |
| rs9416029  | A/G     | -0.062(0.052)       | 0.238   | -0.046(0.041)       | 0.269   | 0.132(0.098)        | 0.181   | 0.154(0.108)        | 0.155   |
| rs3009550  | G/A     | -0.039(0.044)       | 0.382   | -0.064(0.035)       | 0.072   | 0.011(0.045)        | 0.804   | 0.035(0.048)        | 0.467   |
| rs3009554  | G/A     | -0.062(0.052)       | 0.238   | -0.046(0.041)       | 0.269   | 0.244(0.108)        | 0.026*  | 0.139(0.116)        | 0.233   |

Abbreviations: SNP: single nucleotide polymorphism; MAF: minor allele frequency. A linear regression was performed with an additive model; waist circumference for adjusted age and HbA1c levels. The associations' results are estimate, standard error ( $\beta$ ), and the corresponding p-value. p was significant at a value of <0.05. \* Statistical significance.

Table S5: Association of MCU SNPs with hip circumference in the AoU cohort

| SNP        | Alleles | White Men           |         | White Women         |         | Black/AA Men        |         | Black/AA Women      |         |
|------------|---------|---------------------|---------|---------------------|---------|---------------------|---------|---------------------|---------|
|            |         | Estimate( $\beta$ ) | P-value |
| rs34072881 | C/T     | --                  | --      | --                  | --      | 0.091(0.130)        | 0.487   | 0.028(0.123)        | 0.822   |
| rs3009556  | T/C     | 0.002(0.040)        | 0.961   | 0.004(0.029)        | 0.902   | -0.071(0.055)       | 0.199   | -0.005(0.052)       | 0.92    |
| rs6415912  | A/G     | 0.041(0.040)        | 0.307   | 0.022(0.029)        | 0.442   | -0.111(0.054)       | 0.042*  | 0.047(0.052)        | 0.365   |
| rs6480644  | C/T     | 0.041(0.040)        | 0.307   | 0.024(0.029)        | 0.405   | -0.111(0.054)       | 0.042*  | 0.049(0.052)        | 0.342   |
| rs2121094  | G/A     | -0.007(0.040)       | 0.865   | -0.019(0.029)       | 0.513   | -0.109(0.053)       | 0.040*  | 0.049(0.052)        | 0.472   |
| rs7092031  | G/T     | -0.007(0.040)       | 0.865   | -0.021(0.029)       | 0.472   | -0.109(0.053)       | 0.040*  | 0.031(0.051)        | 0.549   |
| rs2121097  | A/T     | -0.007(0.040)       | 0.865   | -0.021(0.029)       | 0.472   | -0.103(0.053)       | 0.052   | 0.045(0.051)        | 0.377   |
| rs7081970  | C/T     | -0.007(0.040)       | 0.865   | -0.020(0.028)       | 0.493   | -0.103(0.053)       | 0.052   | 0.045(0.051)        | 0.377   |
| rs9416029  | A/G     | -0.011(0.040)       | 0.793   | -0.021(0.029)       | 0.473   | 0.059(0.073)        | 0.419   | 0.083(0.068)        | 0.218   |
| rs3009550  | G/A     | 0.021(0.034)        | 0.544   | -0.023(0.025)       | 0.352   | -0.052(0.034)       | 0.133   | -0.010(0.033)       | 0.769   |
| rs3009554  | G/A     | -0.011(0.040)       | 0.793   | -0.021(0.029)       | 0.473   | 0.121(0.078)        | 0.122   | 0.070(0.072)        | 0.331   |

Abbreviations: SNP: single nucleotide polymorphism; MAF: minor allele frequency. A linear regression was performed with an additive model; hip circumference for adjusted age and HbA1c levels. The associations' results are estimate, standard error ( $\beta$ ), and the corresponding p-value. p was significant at a value of <0.05. \* Statistical significance.
